# Supplementary material for: A Novel lnc-RNA, Named lnc-ORA, Is Identified by RNA-Seq Analysis, and Its Knockdown Inhibits Adipogenesis by Regulating the PI3K/AKT/mTOR Signaling Pathway
Source: PubMed Central journal article supplement (PMC6562744; doi:10.3390/cells8050477), 2019-05-18
Supplement: cells-08-00477-s001.pdf [file cells-08-00477-s001.pdf]

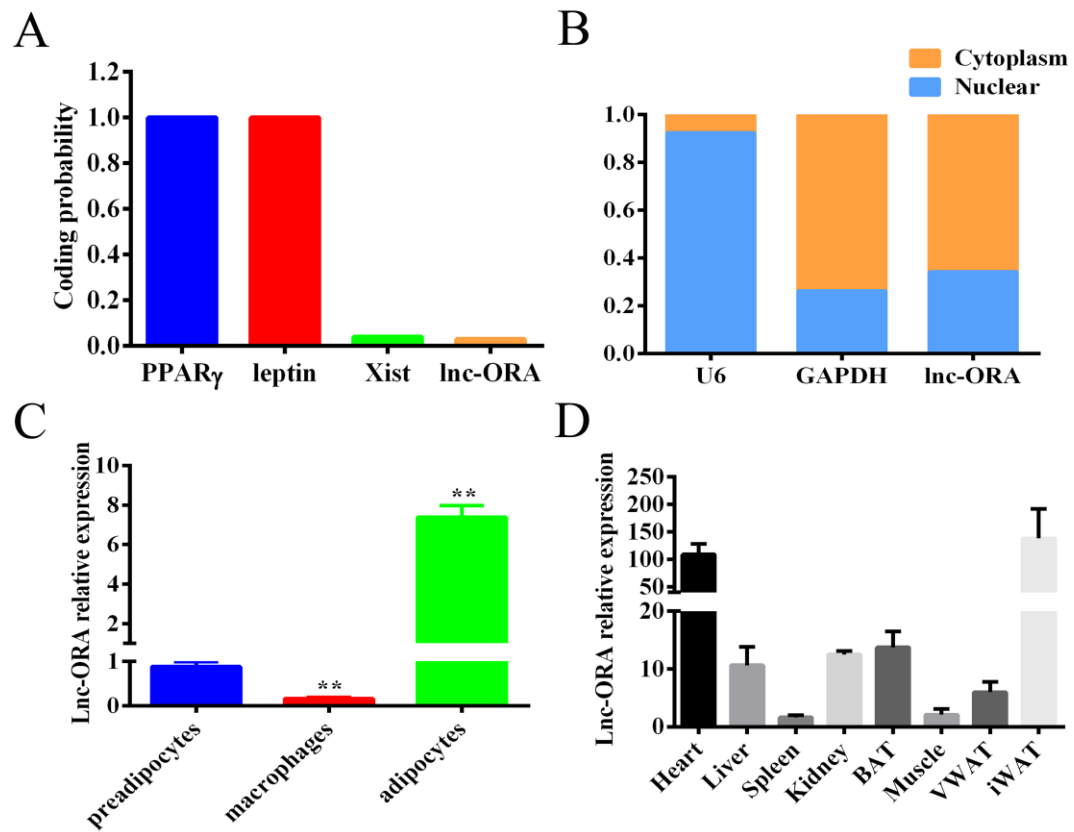

**Figure S2.** The biological characteristics of lnc-ORA. (A) Coding potential of lnc-ORA was predicted by CAPT analysis. (B) The lnc-ORA expression in nuclear and cytoplasmic fractions extracted from preadipocytes. (C) The expression profile of lnc-ORA in preadipocytes, macrophages and adipocytes. (D) The expression level analysis of lnc-ORA in different tissues of mice.

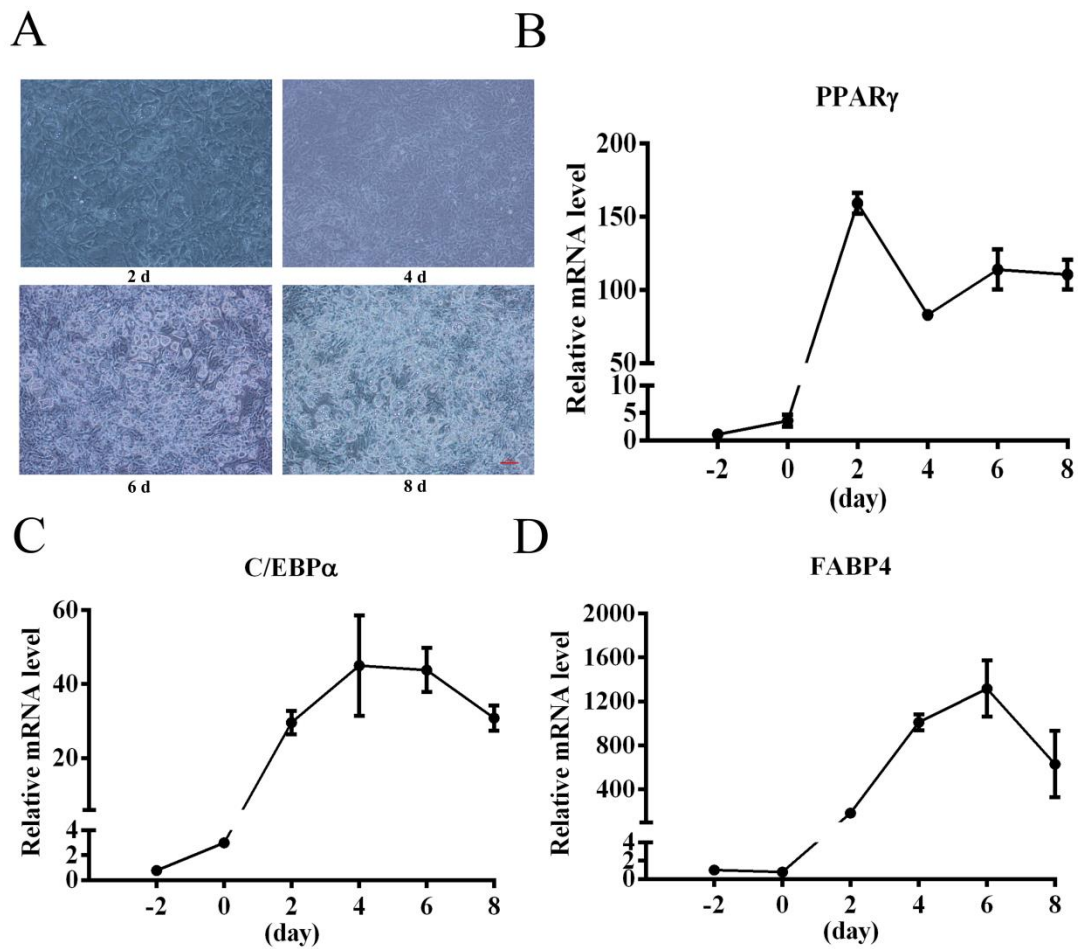

**Figure S3.** The expression pattern of lnc-ORA during 3T3-L1 cell adipogenesis. (A) The 2 d, 4 d, 6 d and 8 d morphology of 3T3-L1 cells. (B-D) The profiling of adipogenic marker genes PPAR $\gamma$ , C/EBP $\alpha$ , and FABP4 during 3T3-L1 cell differentiation.

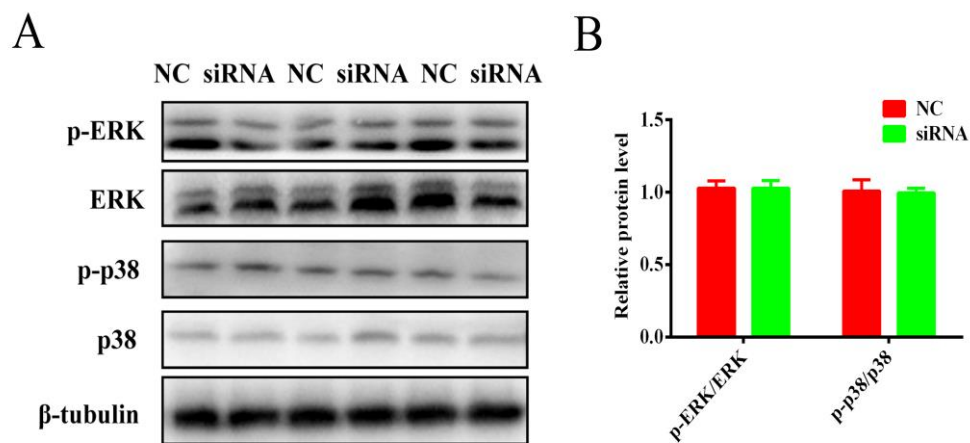

**Figure S4.** ERK and p38 signaling pathways were not implicated in the regulatory adipogenesis of lnc-ORA knockdown. (A) The protein levels of p-ERK, ERK, p-p38, and p38 were detected by western blot. (B) The protein quantification analysis.
